# Supplementary material for: Controllable formation of amorphous structure to improve the oxygen evolution reaction performance of a CoNi LDH
Source: Royal Society of Chemistry journal article supplement (doi:10.1039/d2ra06447b), 2023-01-01
Supplement: d2ra06447b1.pdf [file d2ra06447b1.pdf]

## Supporting Information

### Controllable formation of amorphous structure to improve the oxygen evolution reaction performance of CoNi LDH

*You Ye<sup>a</sup>, Yan Shan\*<sup>a</sup>, Hongli Zhu<sup>b</sup>, Kezheng Chen<sup>a</sup>, Xuegang Yu\*<sup>a</sup>*

<sup>a</sup> Lab of Functional and Biomedical Nanomaterials, College of Materials Science and Engineering, Qingdao University of Science and Technology, Qingdao 266042, China.

<sup>b</sup> Institute 53 of China's Ordnance Industry, Jinan 250031, China

To whom correspondence should be addressed. Tel: +86-532-84023616. Fax: +86-532-84023616. E-Mail: [yuxuegang@qust.edu.cn](mailto:yuxuegang@qust.edu.cn), [shanyan@qust.edu.cn](mailto:shanyan@qust.edu.cn)

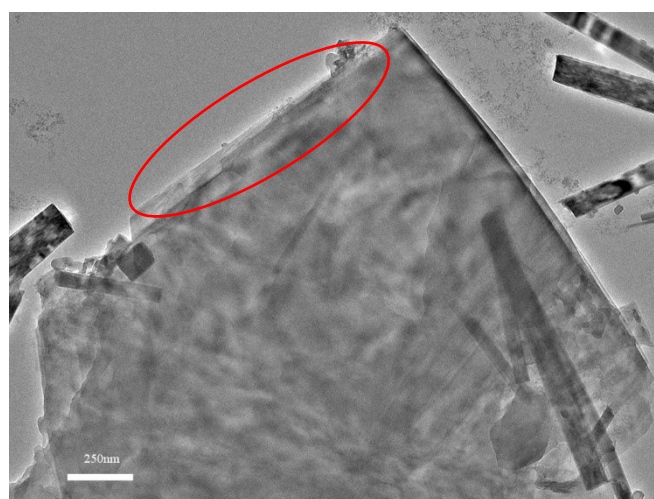

**Fig. S1.** TEM image of CoNi-LDH-E0.

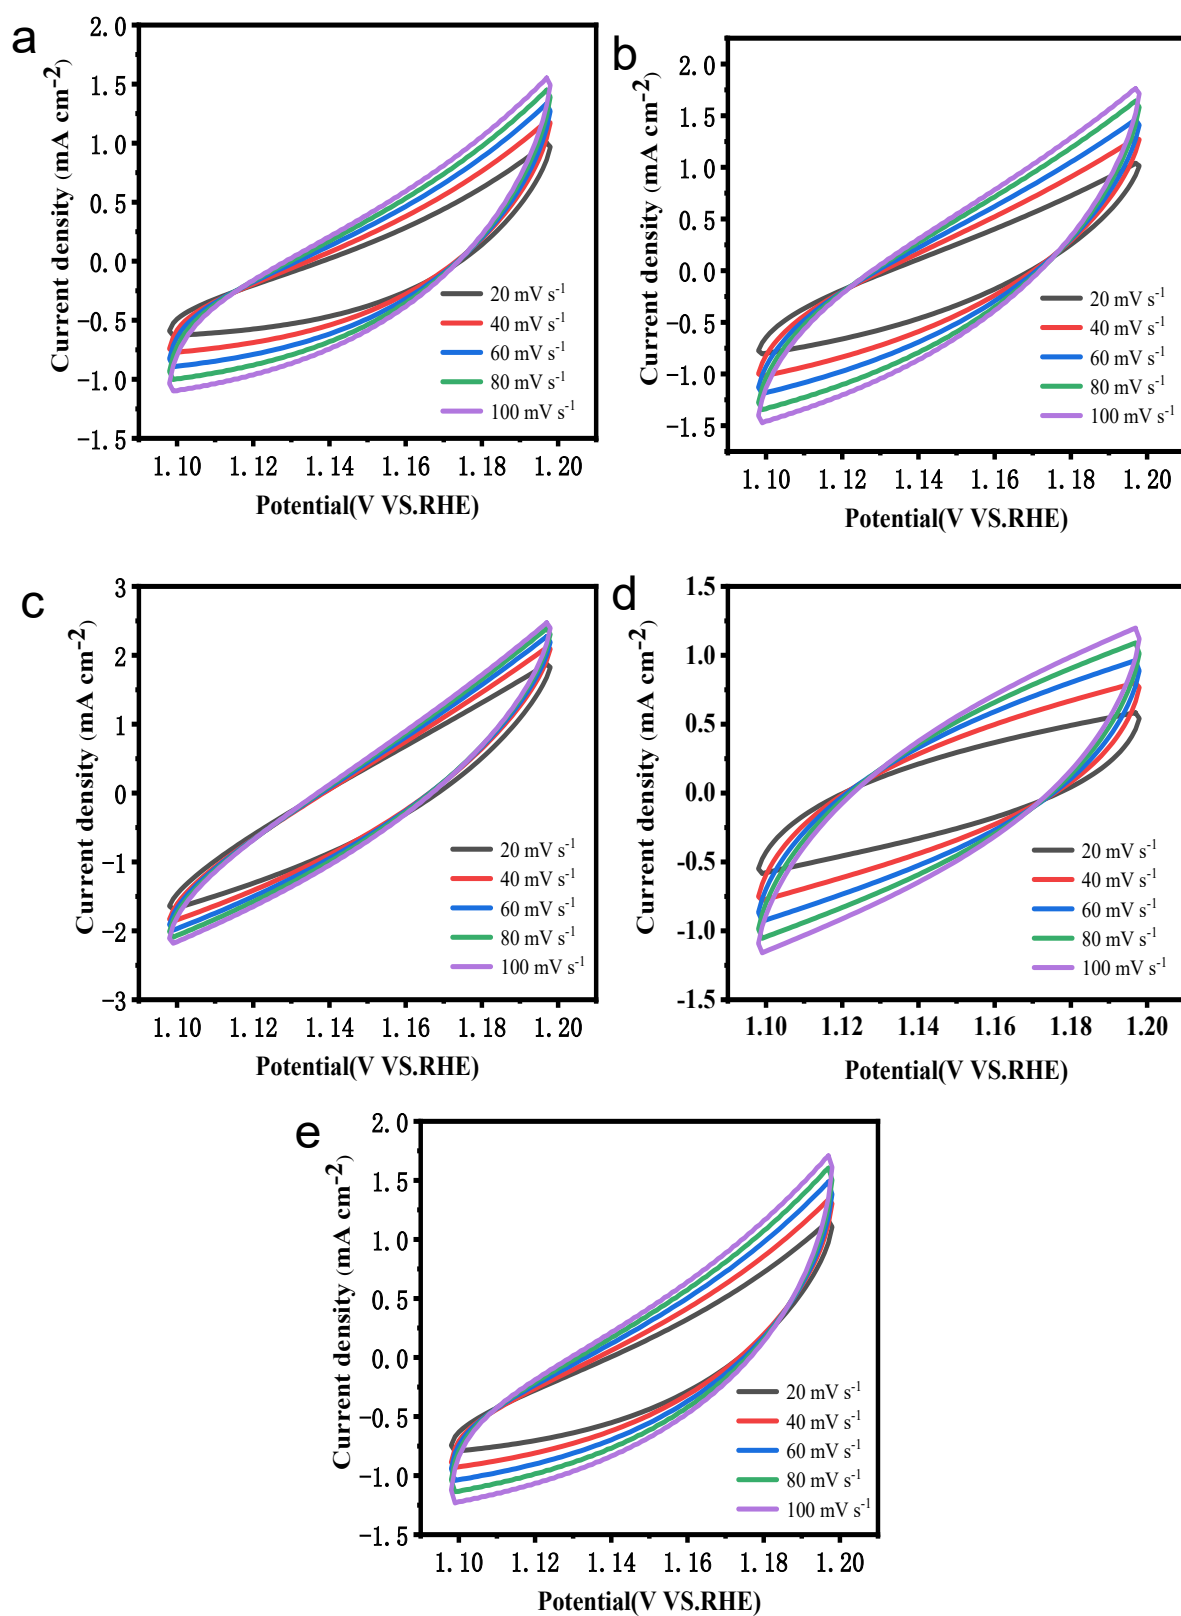

**Fig. S2.** Cyclic voltammety curves of CoNi-LDH treated with different electrooxidation time: (a) 0 h, (b) 2 h, (c) 4 h, (d) 6 h, and (e) RuO<sub>2</sub>.
